# Supplementary material for: A rapid route to perovskites: barium titanate nanoparticles via microwave-assisted solvothermal synthesis
Source: Royal Society of Chemistry journal article supplement (doi:10.1039/d5nr03238e), 2025-01-01
Supplement: d5nr03238e1.pdf [file d5nr03238e1.pdf]

## Rapid Route to Perovskites: Barium Titanate Nanoparticles via Microwave assisted solvothermal Synthesis

Vinith Johnson<sup>1</sup>, Sunil Vasu<sup>1</sup>, Uday Kumar S<sup>1</sup> \*

<sup>1</sup>Department of Chemical Engineering, Indian Institute of Technology Tirupati,  
Andhra Pradesh, India

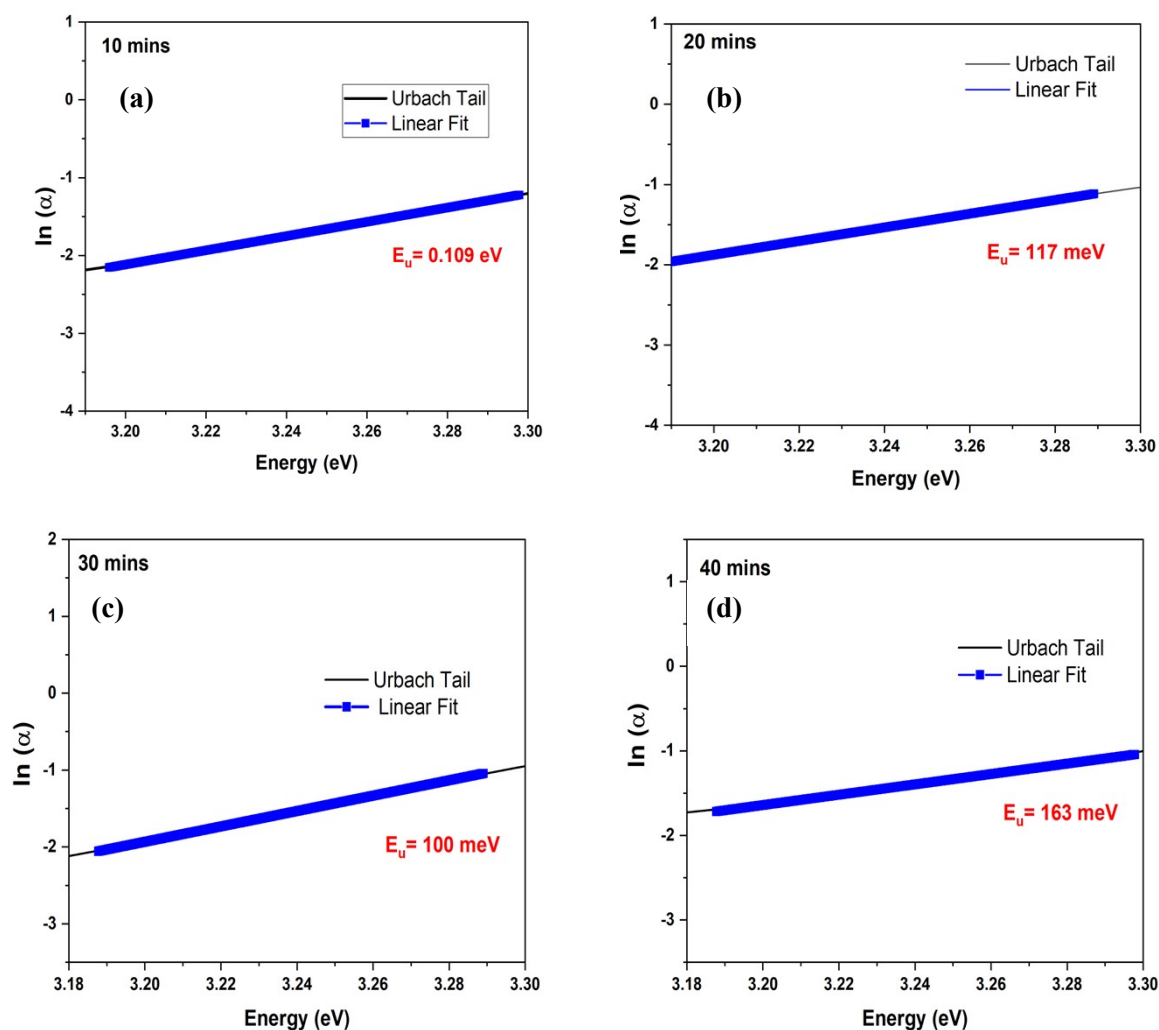

**Figure S1:** Urbach tail plot for samples at different intervals a)10 minutes b)20 minutes, c)30 minutes and d) 40 minutes

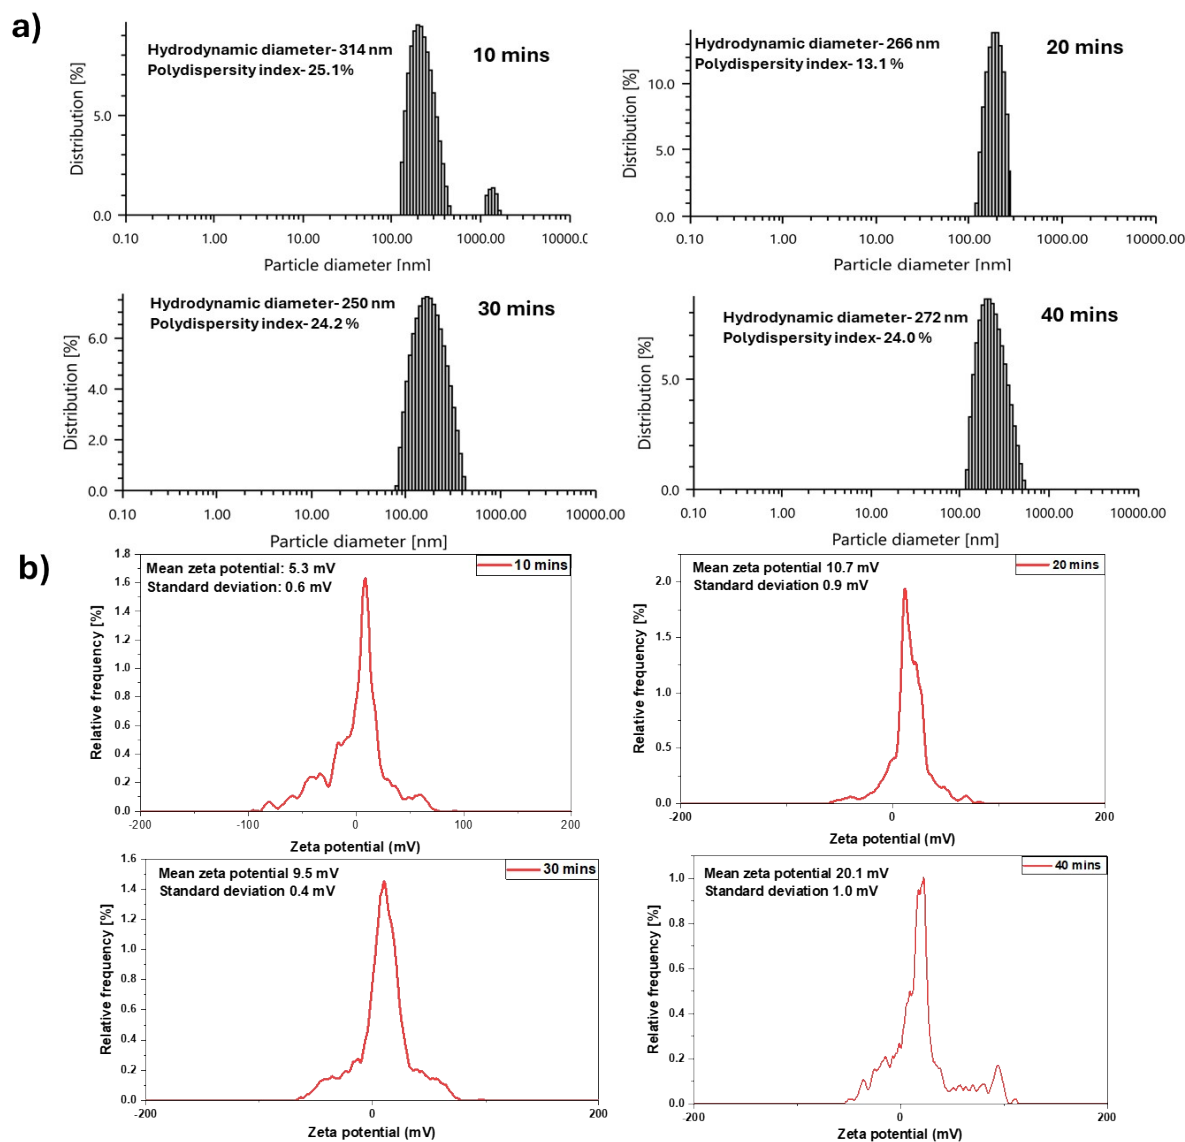

**Figure S2:** a) Particle size and b) zeta potential of barium titanate synthesized at different time intervals.

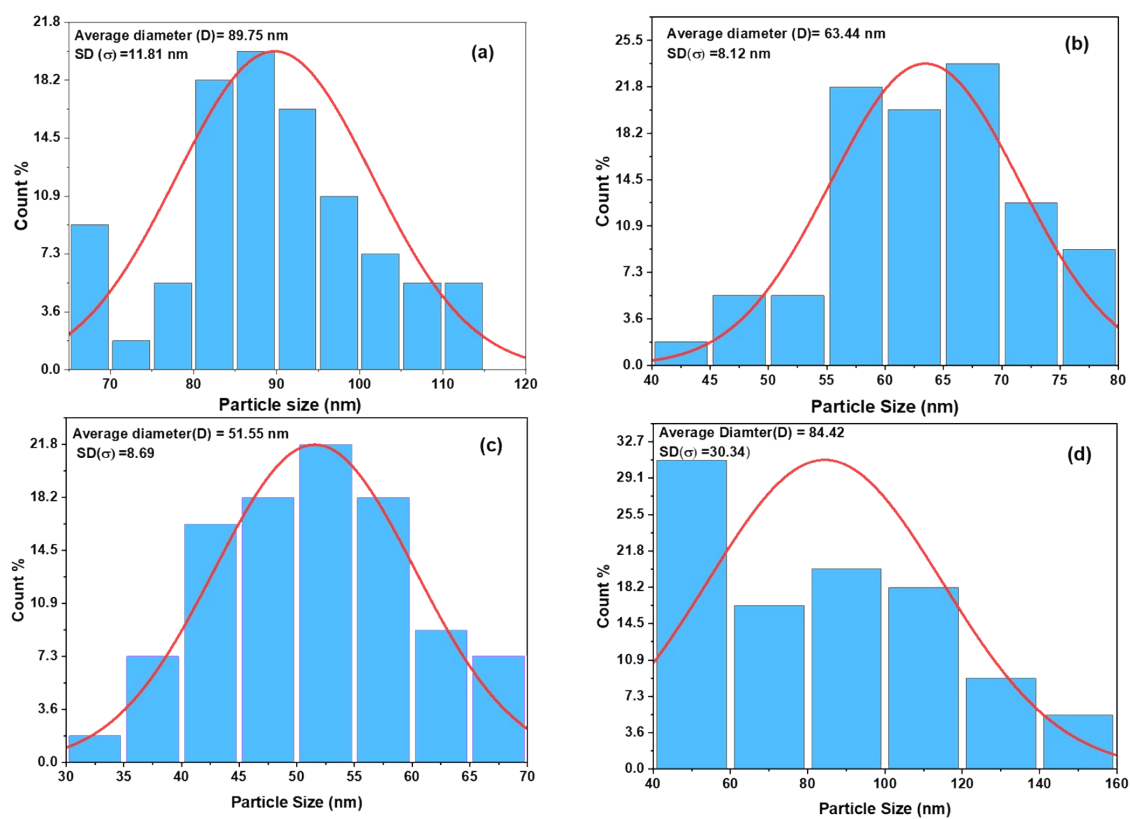

**Figure S3:** Size distribution of the fabricated nanomaterials a)10 minutes b)20 minutes c)30 minutes and d) 40 minutes
